# Supplementary material for: The zinc finger transcription factor PW1/PEG3 restrains murine beta cell cycling
Source: PubMed Central journal article supplement (PMC4901110; doi:10.1007/s00125-016-3954-z), 2016-04-29
Supplement: 125_2016_3954_MOESM1_ESM.pdf [file 125_2016_3954_MOESM1_ESM.pdf]

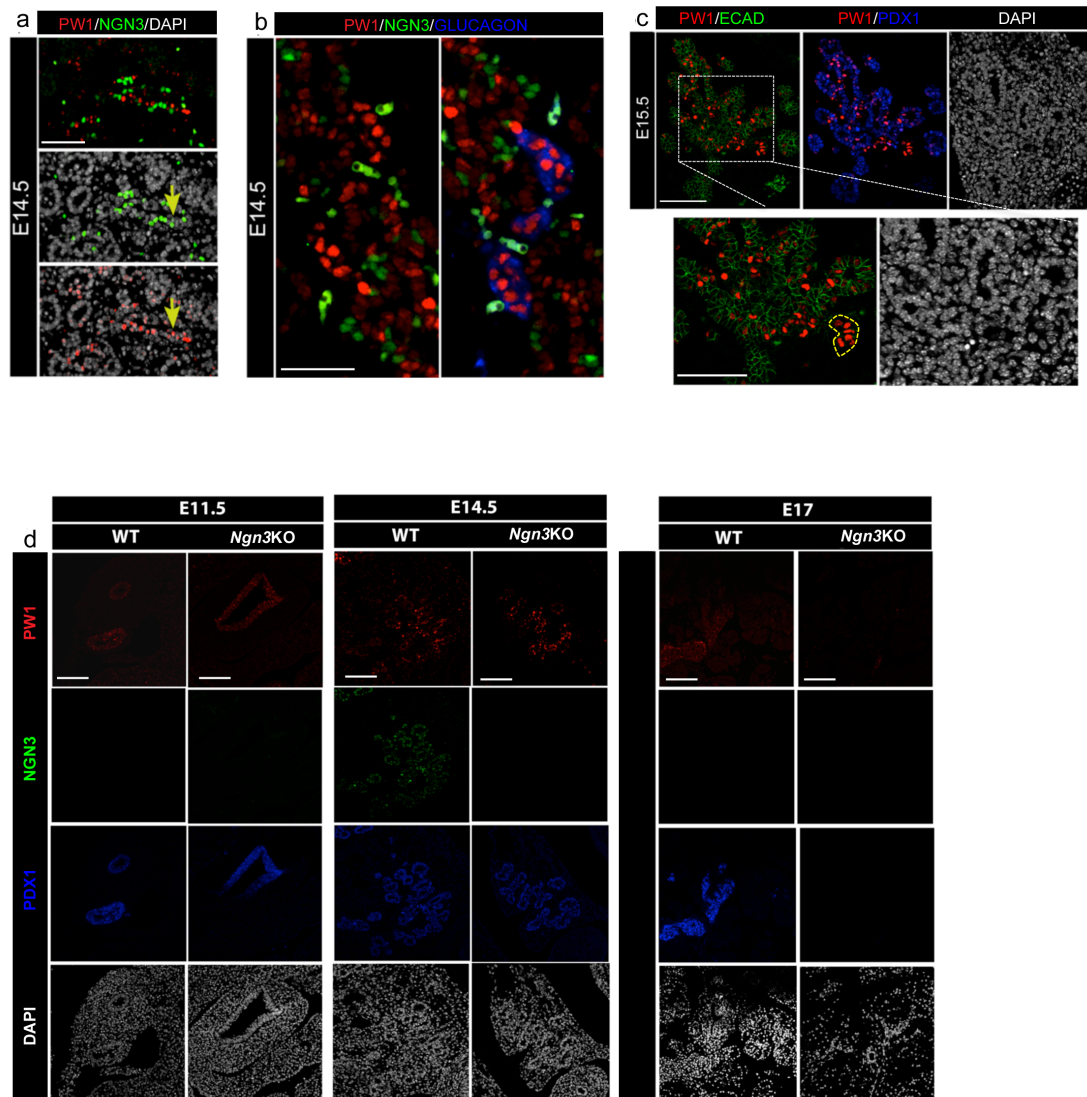

**ESM Fig. 1:** (a) Expression of PW1 (red) and NGN3 (green) in E14.5 mouse pancreas. Only very rare cells co-express both proteins (yellow arrow). Scale bar: 100 $\mu$ m. (b) Far most NGN3<sup>+</sup> cells are hormone<sup>-</sup> and PW1<sup>-</sup> while most of PW1<sup>+</sup> cells are hormone<sup>+</sup> (here GCG in blue). Scale bars: 50 $\mu$ m. (c) At E15.5, E-cadherin expression decreases in PW1<sup>+</sup> cells (red) near ducts during endocrine cell specification (dashed yellow line). Scale bars: 100 $\mu$ m. (d) PW1 (red) is detected in NGN3 (green) null mouse at E11 and E14.5 but not at E17. Scale bars: 100 $\mu$ m.
