# Supplementary material for: The zinc finger transcription factor PW1/PEG3 restrains murine beta cell cycling
Source: PubMed Central journal article supplement (PMC4901110; doi:10.1007/s00125-016-3954-z), 2016-04-29
Supplement: 125_2016_3954_MOESM2_ESM.pdf [file 125_2016_3954_MOESM2_ESM.pdf]

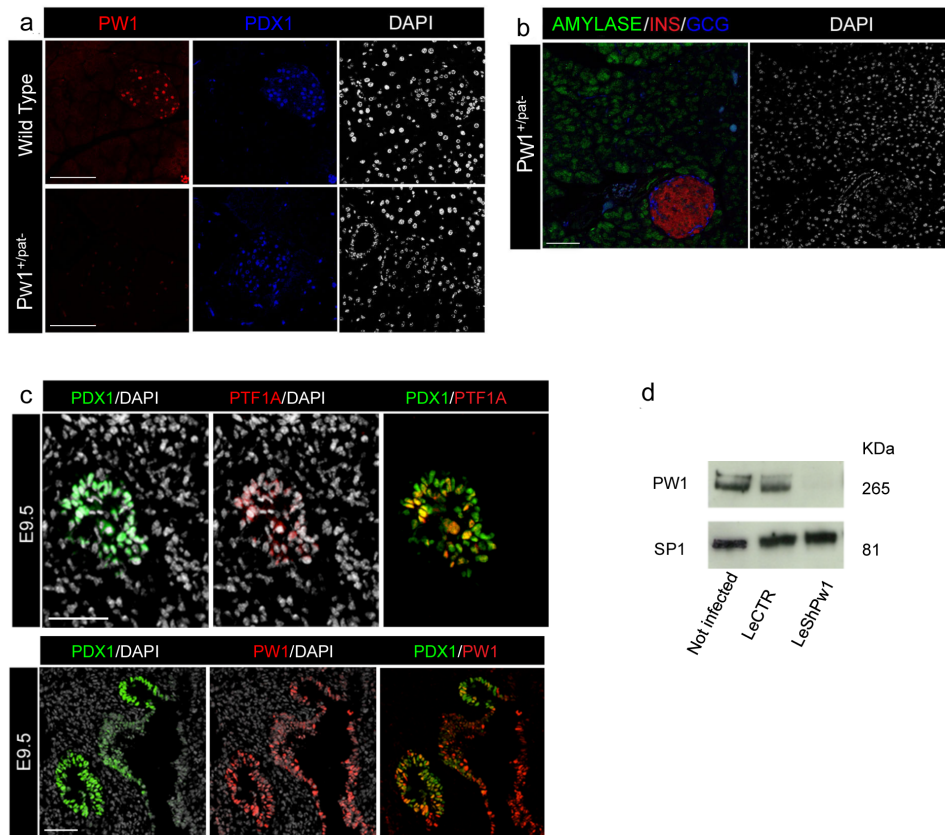

**ESM Fig. 2:** Expression of PW1 in pancreas of  $PW1^{+/pat-}$  and WT mouse. Immunostaining of (a) PW1 (red), PDX1 (blue) and (b) AMYLASE (green), INS (red), GCG (blue) shows normal cytoarchitecture of pancreas from  $PW1^{+/pat-}$  8 weeks old mice. (c) PW1 is expressed in PDX1<sup>+</sup>PTF1A<sup>+</sup> cells of E9.5 embryonic pancreas. Nuclear staining: DAPI (white). Scale bars: 100 $\mu$ m. (d) Infection of Min6 cells with LeShPw1 (MOI 100) decreased the level of PW1 protein as compared to control virus transduced cells. SP1, a ubiquitously expressed transcription factor, was used as quality control.
