# Supplementary material for: The zinc finger transcription factor PW1/PEG3 restrains murine beta cell cycling
Source: PubMed Central journal article supplement (PMC4901110; doi:10.1007/s00125-016-3954-z), 2016-04-29
Supplement: 125_2016_3954_MOESM3_ESM.pdf [file 125_2016_3954_MOESM3_ESM.pdf]

**ESM Table1:** Primary antibodies

| <b>Target</b> | <b>Host</b> | <b>Dilution</b> | <b>Source</b>                                                    |
|---------------|-------------|-----------------|------------------------------------------------------------------|
| CK19          | Rat         | 1:100           | DSHB, Iowa City, IA, USA                                         |
| GFP           | Goat        | 1:200           | Abcam, Cambridge, UK                                             |
| GLUCAGON      | Mouse       | 1:1000          | Sigma-Aldrich, St. Louis, MO, USA                                |
| INSULIN       | Guinea Pig  | 1:5000          | DRC, Brussels, Belgium                                           |
| KI67          | Rat         | 1:5000          | Dako, Glostrup, Denmark                                          |
| NGN3          | Guinea Pig  | 1:1000          | Dr. Gradwohl, INSERM, Strasbourg, France                         |
| NKX2.2        | Mouse       | 1:50            | DSHB, Iowa City, IA, USA                                         |
| PAX6          | Goat        | 1:250           | Santa Cruz Biotechnology, Heidelberg, Germany                    |
| PDX1          | Mouse       | 1:1000          | Dr. Wright, Vanderbilt, Nashville, TN, USA                       |
| PW1           | Rabbit      | 1:2000          | Dr. Sassoon, University of Pierre and Marie Curie, Paris, France |
