# Supplementary material for: The zinc finger transcription factor PW1/PEG3 restrains murine beta cell cycling
Source: PubMed Central journal article supplement (PMC4901110; doi:10.1007/s00125-016-3954-z), 2016-04-29
Supplement: 125_2016_3954_MOESM4_ESM.pdf [file 125_2016_3954_MOESM4_ESM.pdf]

**ESM Table 2:** PrimeTime qPCR Probes (Integrated DNA Technologies, Coralville, IA USA).

| Gene                 | Probe sequence 5'–3'       | Accession number |
|----------------------|----------------------------|------------------|
| <i>Cyclin E1</i>     | CGCACCACTGATAACCTGAGACCTT  | NM_007633.2      |
| <i>Cyclophylin A</i> | TGAGCACTGGAGAGAAAGGATTTGGC | NM_008907        |
| <i>Glucagon</i>      | GAGGAACCGGAACAACATfTGCCAAA | NM_008100.2      |
| <i>Insulin1</i>      | CATCAGCAAGCAGGTCATTGTTTCA  | NM_008386.2      |
| <i>Ki67</i>          | CAATCATCAAGGAACGGCCCCAGTC  | NM_001081117.2   |
| <i>MafA</i>          | CGCACCCAGCCCGGGCACAGGCGGC  | NM_194350.1      |
| <i>Neurogenin3</i>   | AGAAGCCGGCGCAAGAAGGCCAATG  | NM_009719.4      |
| <i>Pdx1</i>          | GTGGGCAGGAGGTGCTTACACAGCG  | NM_008814.2      |
| <i>Pw1</i>           | TTGTGTCATGTGAGAGTGTCG      | NM_008817        |
